# Supplementary material
Source: PubMed Central journal article supplement (PMC10469295)
Supplement: jamadermatol-e232955-s001.pdf [file jamadermatol-e232955-s001.pdf]

## Supplementary Online Content

Witt RG, Cass SH, Tran T, et al. Gut microbiome in patients with early-stage and late-stage melanoma. *JAMA Dermatol*. Published online August 30, 2023.  
doi:10.1001/jamadermatol.2023.2955

**eTable 1.** Permutational Multivariate Analysis of Variance (PERMANOVA) Results for All Relevant Covariates per Cohorts Tested

**eTable 2.** Characteristics of Patients With Melanoma Who Received Adjuvant Treatment After Excision

**eFigure.** Comparison of the Gut Microbiome of Patients With Stage III With Disease Recurrence Following Adjuvant Immune Checkpoint Inhibition

This supplementary material has been provided by the authors to give readers additional information about their work.

**eTable 1.** Permutational Multivariate Analysis of Variance (PERMANOVA) Results for All Relevant Covariates per Cohorts Tested

| <b>Melanoma vs. Controls</b> |            |                 |           |           |                  |
|------------------------------|------------|-----------------|-----------|-----------|------------------|
| <b>Covariates</b>            | <b>Df</b>  | <b>SumOfSqs</b> | <b>R2</b> | <b>F</b>  | <b>Pr(&gt;F)</b> |
| Age                          | 1          | 0.809           | 0.011     | 2.459     | <2e-16           |
| Sex                          | 1          | 0.405           | 0.005     | 1.229     | 0.145            |
| BMI                          | 1          | 0.503           | 0.007     | 1.527     | 0.028            |
| PPI/H2 Blocker               | 1          | 0.384           | 0.005     | 1.167     | 0.208            |
| Melanoma vs Control          | 1          | 1.126           | 0.015     | 3.42      | <2e-16           |
| Corticosteroid               | 1          | 0.311           | 0.004     | 0.945     | 0.546            |
| Statin                       | 1          | 0.251           | 0.003     | 0.762     | 0.867            |
| Antibiotic Use               | 1          | 0.359           | 0.005     | 1.091     | 0.294            |
| Residual                     | 218        | 71.775          | 0.945     | NA        | NA               |
| <b>Total</b>                 | <b>226</b> | <b>75.923</b>   | <b>1</b>  | <b>NA</b> | <b>NA</b>        |

| <b>Early-Stage vs Late-Stage Melanoma</b> |            |                 |           |           |                  |
|-------------------------------------------|------------|-----------------|-----------|-----------|------------------|
| <b>Covariates</b>                         | <b>Df</b>  | <b>SumOfSqs</b> | <b>R2</b> | <b>F</b>  | <b>Pr(&gt;F)</b> |
| Age                                       | 1          | 0.58            | 0.01      | 1.745     | 0.01             |
| Sex                                       | 1          | 0.344           | 0.006     | 1.037     | 0.388            |
| BMI                                       | 1          | 0.364           | 0.006     | 1.097     | 0.295            |
| PPI/H2 Blocker                            | 1          | 0.392           | 0.007     | 1.179     | 0.198            |
| Early vs Late-Stage                       | 1          | 0.504           | 0.009     | 1.519     | 0.032            |
| Corticosteroid                            | 1          | 0.324           | 0.005     | 0.975     | 0.485            |
| Statin                                    | 1          | 0.23            | 0.004     | 0.692     | 0.938            |
| Antibiotic Use                            | 1          | 0.393           | 0.007     | 1.183     | 0.193            |
| Residual                                  | 169        | 56.117          | 0.947     | NA        | NA               |
| <b>Total</b>                              | <b>177</b> | <b>59.247</b>   | <b>1</b>  | <b>NA</b> | <b>NA</b>        |

| <b>Recurrence vs No Recurrence</b> |           |                 |           |           |                  |
|------------------------------------|-----------|-----------------|-----------|-----------|------------------|
| <b>Covariates</b>                  | <b>Df</b> | <b>SumOfSqs</b> | <b>R2</b> | <b>F</b>  | <b>Pr(&gt;F)</b> |
| Age                                | 1         | 0.496           | 0.023     | 1.531     | 0.037            |
| Sex                                | 1         | 0.287           | 0.013     | 0.887     | 0.632            |
| BMI                                | 1         | 0.387           | 0.018     | 1.193     | 0.192            |
| PPI/H2 Blocker                     | 1         | 0.441           | 0.02      | 1.362     | 0.088            |
| Recurrence                         | 1         | 0.351           | 0.016     | 1.084     | 0.317            |
| Corticosteroid                     | 1         | 0.375           | 0.017     | 1.159     | 0.223            |
| Statin                             | 1         | 0.45            | 0.021     | 1.389     | 0.078            |
| Antibiotic use                     | 1         | 0.393           | 0.018     | 1.212     | 0.182            |
| Residual                           | 57        | 18.468          | 0.853     | NA        | NA               |
| <b>Total</b>                       | <b>65</b> | <b>21.649</b>   | <b>1</b>  | <b>NA</b> | <b>NA</b>        |

**eTable 2.** Characteristics of Patients With Melanoma Who Received Adjuvant Treatment After Excision

|                                         | <b>No Recurrence<br/>n=46<sup>1</sup></b> | <b>Recurrence n=20<sup>1</sup></b> | <b>p-value</b> |
|-----------------------------------------|-------------------------------------------|------------------------------------|----------------|
| <b>Age</b>                              | 60 (28-81)                                | 51 (21-90)                         | 0.26           |
| <b>Sex</b>                              |                                           |                                    | 0.79           |
| <b>Female</b>                           | 19 (41.3%)                                | 9 (45%)                            |                |
| <b>Male</b>                             | 27 (58.7%)                                | 11 (55%)                           |                |
| <b>BMI</b>                              | 30.6* (23.9-48.9)                         | 31.4 (23.6–50.2)                   | 0.90           |
| <b>Race</b>                             |                                           |                                    | 1.0            |
| <b>White</b>                            | 45 (97.8%)                                | 20 (100%)                          |                |
| <b>Asian</b>                            | 1 (2.2%)                                  | 0 (0%)                             |                |
| <b>Stage</b>                            |                                           |                                    | 0.19           |
| <b>IIIA</b>                             | 10 (21.7%)                                | 1 (5.0%)                           |                |
| <b>IIIB</b>                             | 13 (26.1%)                                | 5 (20.0%)                          |                |
| <b>IIIC</b>                             | 21 (45.7%)                                | 11 (55.0%)                         |                |
| <b>IIID</b>                             | 2 (4.4%)                                  | 3 (15.0%)                          |                |
| <b>Adjuvant Therapies</b>               |                                           |                                    | 0.80           |
| <b>Anti-PD-1</b>                        | 39 (84.8%)                                | 16 (80.0%)                         |                |
| <b>Anti-CTLA-4</b>                      | 4 (8.7%)                                  | 3 (15.0%)                          |                |
| <b>Targeted</b>                         | 2 (4.3%)                                  | 1 (5.0%)                           |                |
| <b>Other</b>                            | 1** (2.2%)                                | 0 (0%)                             |                |
| <b>Medications<br/>(within 30 days)</b> |                                           |                                    |                |
| <b>Antibiotic Use</b>                   | 9 (19.6%)                                 | 5 (25%)                            | 0.62           |
| <b>PPI/H2 Blocker</b>                   | 16 (34.8%)                                | 3 (15.0%)                          | 0.14           |
| <b>Metformin</b>                        | 6 (13.0%)                                 | 1 (5.0%)                           | 0.67           |
| <b>Statin</b>                           | 14 (30.4%)                                | 3 (15.0%)                          | 0.23           |
| <b>Corticosteroids</b>                  | 5 (10.9%)                                 | 1 (5.0%)                           | 0.66           |

BMI – Body Mass Index, PPI – Proton Pump Inhibitor

<sup>1</sup>Median (Range); n (%)

\* missing BMI value for a single patient who did not develop recurrence (n=1)

\*\* Other therapy received by one patient who did not develop recurrence (n=1) was adjuvant interferon alfa-2b

**eFigure.** Comparison of the Gut Microbiome of Patients With Stage III With Disease Recurrence Following Adjuvant Immune Checkpoint Inhibition

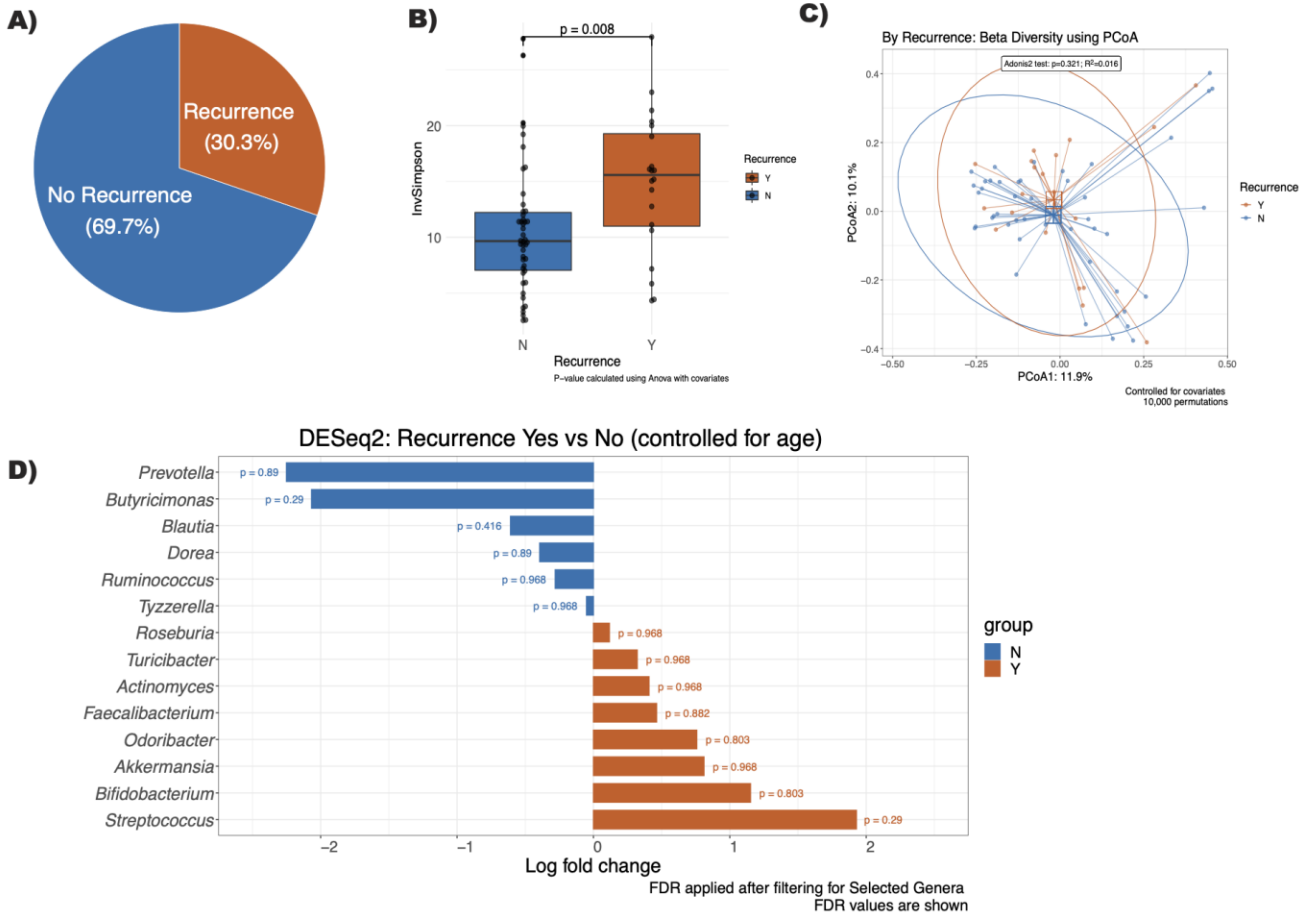

A) Recurrence occurred in 30.3% of all included stage III patients who underwent adjuvant therapy. Significant differences were seen in those that did and did not recur with regard to B)  $\alpha$ -diversity ( $p=0.008$ ) but not with C)  $\beta$ -diversity. D) DESeq2 analysis of known bacterial genus that impact response to immunotherapy was performed with no statistically significant differences on adjusted analysis.
