# Supplementary material
Source: PubMed Central journal article supplement (PMC10469295)
Supplement: jamadermatol-e232955-s002.pdf [file jamadermatol-e232955-s002.pdf]

## Data Sharing Statement

Witt. Gut Microbiome in Patients With Early-Stage and Late-Stage Melanoma. *JAMA Dermatol.*  
Published August 30, 2023. doi:10.1001/jamadermatol.2023.2955

### Data

**Data available:** No

### Additional Information

**Explanation for why data not available:** Datasets generated during and/or analyzed during the current study are available from the corresponding authors on reasonable request.
